# Supplementary material for: Characterization and prediction of protein nucleolar localization sequences
Source: PubMed Central journal article supplement — Nucleic Acids Res. 2010 Jul 26;38(21):7388–99. doi: 10.1093/nar/gkq653 (PMC2995072; doi:10.1093/nar/gkq653), 2010-07-26
Supplement: supp_gkq653_SupplementaryFile1.pdf [file supp_gkq653_SupplementaryFile1.pdf]

## Experimentally Validated NoLS (EVN) dataset

| Accession    | Protein Name          | NoLS                                                      | Targets reporter protein to nucleolus <sup>a</sup> | References |
|--------------|-----------------------|-----------------------------------------------------------|----------------------------------------------------|------------|
| NP_001012270 | Survivin              | MQRKPTIRRNLRRLRRK                                         | GFP                                                | [1]        |
| NP_006161    | p120                  | SKRLSSRARKRAAKRRLG                                        | β-gal (but requires additional NLS)                | [2]        |
| NP_005336    | HSP70                 | FKRKHKKDISQNKRAVRR                                        | GFP                                                | [3,4]      |
| NP_937862    | ING1b (NoLS-1)        | DKPNSKRSRRQRNNENR                                         | GFP                                                | [5]        |
| NP_937862    | ING1b (NoLS-2)        | TPKEKAKTSKKKKRSKAKA                                       | GFP                                                | [5]        |
| NP_005238    | FGF3                  | GKGVQPRRRRQKQSPDNLEP                                      | N/A                                                | [6]        |
| NP_006618    | Rpp29                 | RHKRKEKKKAKGLSARQRREL                                     | GFP                                                | [7]        |
| NP_945316    | PTHrP                 | GKKKKGKPGKRREQEKKRRRT                                     | β-gal                                              | [8]        |
| NP_003778    | NOLP                  | KEKIQAIIDSCRRQFPEYQERAR                                   | N/A                                                | [9]        |
| NP_001002    | S7                    | RRILPKPTRKSRTKNKQKRPR                                     | N/A                                                | [10]       |
| NP_001034800 | DEDD                  | LKRRRA                                                    | N/A                                                | [11]       |
| NP_001091059 | Rpp38                 | KIKKLIPNPNKIRKPPKSKKATPK                                  | GFP                                                | [7]        |
| NP_478102    | ARF                   | QLRRPRHSHPTRARRCP                                         | GFP                                                | [12]       |
| NP_003133    | La                    | QESLNKWKSKGRRRFKGGKGNKA<br>AQP GSGK GK                    | PTB-GFP                                            | [13]       |
| NP_005560    | LIMK2                 | KKRTLKNDRKKR                                              | GFP                                                | [14]       |
| NP_001997    | FGF2                  | RSRYTWSYVALKR                                             | GFP                                                | [15]       |
| NP_477352    | PI4K230               | SKKTNRGSQQLHKYMKRRTL                                      | <i>soybean trypsin inhibitor</i>                   | [16]       |
| NP_002383    | MDM2                  | KKLLKRNK                                                  | <i>thioredoxin</i>                                 | [17]       |
| NP_003945    | NIK                   | RKKRKKK                                                   | GFP                                                | [18]       |
| NP_078908    | SAP30L                | RRYKRHYK                                                  | N/A                                                | [19]       |
| NP_951038    | HIC p40               | GRCRRLANFPGRKRRRRR                                        | GFP                                                | [20]       |
| NP_848927    | LYRIC (NoLS-1)        | KSKKKKKKKKQGE                                             | GFP                                                | [21]       |
| NP_848927    | LYRIC (NoLS-2)        | KQIKKKKKARRET                                             | GFP                                                | [21]       |
| NP_078805    | Parafibromin (NoLS-1) | RRAATENIPVVRPDRK                                          | GFP                                                | [22]       |
| NP_078805    | Parafibromin (NoLS-2) | KKKQGCQRENETLIQRRK                                        | GFP                                                | [22]       |
| NP_078905    | MLF-1                 | MAPRGRRRPRPHRSEGARRSKNT<br>LERTHS                         | GFP                                                | [23]       |
| NP_060239    | G2E3                  | RKHDDCPNKYGEKKTKEK                                        | N/A                                                | [24]       |
| NP_077289    | Nop25                 | KRKHPRAAQDSKPPRAPRTSKAQ<br>RRR                            | GFP fused to rat Nop25-NoLS                        | [25]       |
| NP_039252    | NRG1-beta             | MSERKEGRGKGGKKKERGSK                                      | GFP                                                | [26]       |
| NP_055318    | DRIM                  | KKMKKHKHKNSEAKKRK                                         | GFP                                                | [27]       |
| NP_849193    | STT3-B                | KQKYLSKKTTRKRGYIKNKLVFVK<br>GKKISKKT V                    | GFP                                                | [28]       |
| NP_068810    | RelA                  | EQPKQRGMRFYKCEGRSAGSIP<br>GER                             | N/A                                                | [29]       |
| NP_112578    | PAPA-1                | HGHGVHKKKHKHKKHKKH                                        | N/A                                                | [30]       |
| AAB60345     | L1 ORF2               | RLKIKGQRKIYQANGKQKK                                       | N/A                                                | [31]       |
| AAH01024     | Nucleostemin          | KRPKLKASKRMTCHKRYKIQKKV<br>REHHRKLRLEAKKQGHKKPRK          | N/A                                                | [32]       |
| NP_002511    | B23                   | QDLWQWRKSL                                                | GFP                                                | [33]       |
| NP_937983    | hTERT                 | MPRAPRCRAVRSLLR                                           | GFP                                                | [34]       |
| NP_003277    | DNA topo I            | NKKKKPKKE                                                 | N/A                                                | [35]       |
| NP_796375    | midnolin              | QQKRLRRKARRDARGPYHWSPSR<br>KAGRS                          | GFP                                                | [36]       |
| NP_004851    | FXR2P                 | RPQRNRNRRRRNR                                             | N/A                                                | [37]       |
| NP_000347    | TCOF                  | KRKKDKEKKEKKKAKKASTKDSE<br>SPSQKKKKKKTAEQTV               | GFP                                                | [38,39]    |
| NP_004695    | U3-55K                | GQEHLRGRWWRIKEARNSVCIPLR<br>RVPVPPAAGS                    | N/A                                                | [40]       |
| NP_150241    | PML-I                 | DRPLVFFDLKIDN                                             | GFP                                                | [41]       |
| NP_061940    | GNL3L                 | MMKLRHKNKKPGEKSGHKKISW<br>PYPQPAKQNGKKATSKVPSAPHFV<br>HPN | GFP                                                | [42]       |
| NP_004251    | RECQL4                | KQAWKQKWRKK                                               | GFP                                                | [43]       |
| NP_068778    | Inh3                  | HRKGRRR                                                   | N/A                                                | [44]       |

<sup>a</sup> Indicates whether this NoLS has been shown to target a reporter protein to the nucleolus when fused to it. The reporter protein chosen is reported.

## References

1. Song Z, Wu M (2005) Identification of a novel nucleolar localization signal and a degradation signal in Survivin-deltaEx3: a potential link between nucleolus and protein degradation. *Oncogene* 24: 2723-2734.
2. Valdez BC, Perlaky L, Henning D, Saijo Y, Chan PK, et al. (1994) Identification of the nuclear and nucleolar localization signals of the protein p120. Interaction with translocation protein B23. *J Biol Chem* 269: 23776-23783.
3. Dang CV, Lee WM (1989) Nuclear and nucleolar targeting sequences of c-erb-A, c-myc, N-myc, p53, HSP70, and HIV tat proteins. *J Biol Chem* 264: 18019-18023.
4. Knowlton AA (1999) Mutation of amino acids 246-251 alters nuclear accumulation of human heat shock protein (HSP) 72 with stress, but does not reduce viability. *J Mol Cell Cardiol* 31: 523-532.
5. Scott M, Boisvert FM, Vieyra D, Johnston RN, Bazett-Jones DP, et al. (2001) UV induces nucleolar translocation of ING1 through two distinct nucleolar targeting sequences. *Nucleic Acids Res* 29: 2052-2058.
6. Antoine M, Reimers K, Dickson C, Kiefer P (1997) Fibroblast growth factor 3, a protein with dual subcellular localization, is targeted to the nucleus and nucleolus by the concerted action of two nuclear localization signals and a nucleolar retention signal. *J Biol Chem* 272: 29475-29481.
7. Jarrous N, Wolenski JS, Wesolowski D, Lee C, Altman S (1999) Localization in the nucleolus and coiled bodies of protein subunits of the ribonucleoprotein ribonuclease P. *J Cell Biol* 146: 559-572.
8. Henderson JE, Amizuka N, Warshawsky H, Biasotto D, Lanske BM, et al. (1995) Nucleolar localization of parathyroid hormone-related peptide enhances survival of chondrocytes under conditions that promote apoptotic cell death. *Mol Cell Biol* 15: 4064-4075.
9. Ueki N, Kondo M, Seki N, Yano K, Oda T, et al. (1998) NOLP: identification of a novel human nucleolar protein and determination of sequence requirements for its nucleolar localization. *Biochem Biophys Res Commun* 252: 97-102.
10. Annilo T, Karis A, Hoth S, Rikk T, Kruppa J, et al. (1998) Nuclear import and nucleolar accumulation of the human ribosomal protein S7 depends on both a minimal nuclear localization sequence and an adjacent basic region. *Biochem Biophys Res Commun* 249: 759-766.
11. Stegh AH, Schickling O, Ehret A, Scaffidi C, Peterhansel C, et al. (1998) DEDD, a novel death effector domain-containing protein, targeted to the nucleolus. *Embo J* 17: 5974-5986.
12. Zhang Y, Xiong Y (1999) Mutations in human ARF exon 2 disrupt its nucleolar localization and impair its ability to block nuclear export of MDM2 and p53. *Mol Cell* 3: 579-591.
13. Horke S, Reumann K, Schweizer M, Will H, Heise T (2004) Nuclear trafficking of La protein depends on a newly identified nucleolar localization signal and the ability to bind RNA. *J Biol Chem* 279: 26563-26570.
14. Goyal P, Pandey D, Siess W (2006) Phosphorylation-dependent regulation of unique nuclear and nucleolar localization signals of LIM kinase 2 in endothelial cells. *J Biol Chem* 281: 25223-25230.
15. Sheng Z, Lewis JA, Chirico WJ (2004) Nuclear and nucleolar localization of 18-kDa fibroblast growth factor-2 is controlled by C-terminal signals. *J Biol Chem* 279: 40153-40160.
16. Kakuk A, Friedlander E, Vereb G, Jr., Lisboa D, Bagossi P, et al. (2008) Nuclear and nucleolar localization signals and their targeting function in phosphatidylinositol 4-kinase PI4K230. *Exp Cell Res* 314: 2376-2388.
17. Lohrum MA, Ashcroft M, Kubbutat MH, Vousden KH (2000) Identification of a cryptic nucleolar-localization signal in MDM2. *Nat Cell Biol* 2: 179-181.
18. Birbach A, Bailey ST, Ghosh S, Schmid JA (2004) Cytosolic, nuclear and nucleolar localization signals determine subcellular distribution and activity of the NF-kappaB inducing kinase NIK. *J Cell Sci* 117: 3615-3624.

19. Viiri KM, Korkeamaki H, Kukkonen MK, Nieminen LK, Lindfors K, et al. (2006) SAP30L interacts with members of the Sin3A corepressor complex and targets Sin3A to the nucleolus. *Nucleic Acids Res* 34: 3288-3298.
20. Thebault S, Basbous J, Gay B, Devaux C, Mesnard JM (2000) Sequence requirement for the nucleolar localization of human I-mfa domain-containing protein (HIC p40). *Eur J Cell Biol* 79: 834-838.
21. Thirkettle HJ, Girling J, Warren AY, Mills IG, Sahadevan K, et al. (2009) LYRIC/AEG-1 is targeted to different subcellular compartments by ubiquitylation and intrinsic nuclear localization signals. *Clin Cancer Res* 15: 3003-3013.
22. Hahn MA, Marsh DJ (2007) Nucleolar localization of parafibromin is mediated by three nucleolar localization signals. *FEBS Lett* 581: 5070-5074.
23. Suzuki H, Arakawa Y, Ito M, Saito S, Takeda N, et al. (2007) MLF1-interacting protein is mainly localized in nucleolus through N-terminal bipartite nuclear localization signal. *Anticancer Res* 27: 1423-1430.
24. Brooks WS, Banerjee S, Crawford DF (2007) G2E3 is a nucleo-cytoplasmic shuttling protein with DNA damage responsive localization. *Exp Cell Res* 313: 665-676.
25. Fujiwara T, Suzuki S, Kanno M, Sugiyama H, Takahashi H, et al. (2006) Mapping a nucleolar targeting sequence of an RNA binding nucleolar protein, Nop25. *Exp Cell Res* 312: 1703-1712.
26. Golding M, Ruhrberg C, Sandle J, Gullick WJ (2004) Mapping nucleolar and spliceosome localization sequences of neuregulin1-beta3. *Exp Cell Res* 299: 110-118.
27. Liu J, Du X, Ke Y (2006) Mapping nucleolar localization sequences of 1A6/DRIM. *FEBS Lett* 580: 1405-1410.
28. Caron E, Cote C, Parisien M, Major F, Perreault C (2006) Identification of two distinct intracellular localization signals in STT3-B. *Arch Biochem Biophys* 445: 108-114.
29. Stark LA, Dunlop MG (2005) Nucleolar sequestration of RelA (p65) regulates NF-kappaB-driven transcription and apoptosis. *Mol Cell Biol* 25: 5985-6004.
30. Kuroda TS, Maita H, Tabata T, Taira T, Kitaura H, et al. (2004) A novel nucleolar protein, PAPA-1, induces growth arrest as a result of cell cycle arrest at the G1 phase. *Gene* 340: 83-98.
31. Goodier JL, Ostertag EM, Engleka KA, Seleme MC, Kazazian HH, Jr. (2004) A potential role for the nucleolus in L1 retrotransposition. *Hum Mol Genet* 13: 1041-1048.
32. Tsai RY, McKay RD (2002) A nucleolar mechanism controlling cell proliferation in stem cells and cancer cells. *Genes Dev* 16: 2991-3003.
33. Nishimura Y, Ohkubo T, Furuichi Y, Umekawa H (2002) Tryptophans 286 and 288 in the C-terminal region of protein B23.1 are important for its nucleolar localization. *Biosci Biotechnol Biochem* 66: 2239-2242.
34. Yang Y, Chen Y, Zhang C, Huang H, Weissman SM (2002) Nucleolar localization of hTERT protein is associated with telomerase function. *Exp Cell Res* 277: 201-209.
35. Mo YY, Wang C, Beck WT (2000) A novel nuclear localization signal in human DNA topoisomerase I. *J Biol Chem* 275: 41107-41113.
36. Tsukahara M, Suemori H, Noguchi S, Ji ZS, Tsunoo H (2000) Novel nucleolar protein, midnolin, is expressed in the mesencephalon during mouse development. *Gene* 254: 45-55.
37. Tamanini F, Kirkpatrick LL, Schonkeren J, van Unen L, Bontekoe C, et al. (2000) The fragile X-related proteins FXR1P and FXR2P contain a functional nucleolar-targeting signal equivalent to the HIV-1 regulatory proteins. *Hum Mol Genet* 9: 1487-1493.
38. Fujioka H, Ariga T, Horiuchi K, Ishikiriya S, Oyama K, et al. (2008) Detection of a novel silent deletion, a missense mutation and a nonsense mutation in TCOF1. *Pediatr Int* 50: 806-809.
39. Winokur ST, Shiang R (1998) The Treacher Collins syndrome (TCOF1) gene product, treacle, is targeted to the nucleolus by signals in its C-terminus. *Hum Mol Genet* 7: 1947-1952.
40. Pluk H, Soffner J, Luhrmann R, van Venrooij WJ (1998) cDNA cloning and characterization of the human U3 small nucleolar ribonucleoprotein complex-associated 55-kilodalton protein. *Mol Cell Biol* 18: 488-498.
41. Condemine W, Takahashi Y, Le Bras M, de The H (2007) A nucleolar targeting signal in PML-I addresses PML to nucleolar caps in stressed or senescent cells. *J Cell Sci* 120: 3219-3227.

42. Rao MR, Kumari G, Balasundaram D, Sankaranarayanan R, Mahalingam S (2006) A novel lysine-rich domain and GTP binding motifs regulate the nucleolar retention of human guanine nucleotide binding protein, GNL3L. *J Mol Biol* 364: 637-654.
43. Woo LL, Futami K, Shimamoto A, Furuichi Y, Frank KM (2006) The Rothmund-Thomson gene product RECQL4 localizes to the nucleolus in response to oxidative stress. *Exp Cell Res* 312: 3443-3457.
44. Huang HS, Pozarowski P, Gao Y, Darzynkiewicz Z, Lee EY (2005) Protein phosphatase-1 inhibitor-3 is co-localized to the nucleoli and centrosomes with PP1gamma1 and PP1alpha, respectively. *Arch Biochem Biophys* 443: 33-44.
