# Supplementary material for: Characterization and prediction of protein nucleolar localization sequences
Source: PubMed Central journal article supplement — Nucleic Acids Res. 2010 Jul 26;38(21):7388–99. doi: 10.1093/nar/gkq653 (PMC2995072; doi:10.1093/nar/gkq653), 2010-07-26
Supplement: supp_gkq653_SupplementaryFile2.pdf [file supp_gkq653_SupplementaryFile2.pdf]

Non-NoLS NLSs that are used as negative training examples.

>NP\_000465\_twist\_nls  
sgkrgrkrssrrsagggagpggaagggvgggdepqspaqgkrgkksag  
>NP\_954659\_matrin3\_nls  
lkkdkrkrksyspdgkespsdkkskt  
>NP\_150091\_LEDGF/p75\_nls  
tpkaarrgrkrkaekqvete  
>NP\_001005862\_erb-B2\_nls  
ilikrrqgkirkytmrllq  
>NP\_001869\_CRABP-II\_nls  
lkvlgvnmlrkiavaaaskp  
>NP\_542378\_Tbx1\_nls  
ydhylgaksrpapyplpplr  
>NP\_000312\_Rb1\_nls  
rvlkrsaegsnppkplkklr  
>NP\_005740\_tob\_nls  
nklprrrvnifgeelerllkky  
>NP\_005059\_SIM1\_nls  
tdnrkgaksrlsssksksrtsppqy  
>NP\_054831\_TRPS1\_nls  
ngeqiirrrtrkrlnpealq  
>NP\_065574\_ChAT\_iso2\_nls  
mglrtakrglggggkwkre  
>NP\_005021\_Plk1\_nls  
elcrrrslllelhkrrkalte  
>NP\_005135\_hairless\_nls  
lkragspvqgamgspapkr  
>NP\_006075\_p48\_nls  
kgkykegdtggpavwktrlr  
>NP\_000200\_PDX-1\_nls  
kiwfgnrrmkwkkeedkkrq  
>NP\_015559\_RanBP3\_nls  
dsdredgnycppvkertss  
>NP\_001776\_cytidine\_deaminase\_nls  
maqkrpactlkpevqqlvcsqeakk  
>NP\_001460\_Ku70\_nls  
gkvtkrkhdnegsgskrpkv  
>NP\_006249\_protein\_kinase, cGMP-dependent, type I isoform 2 nls  
sktfamkilkrrhivdtrqq  
>NP\_001092755\_prothymosin\_alpha\_nls  
gkraaeddedddvdtkkqktdedd  
>NP\_848514\_ARNT\_nls  
raikrrpglfddddgegnsklr  
>NP\_002102\_Huntingdon\_disease\_protein\_nls  
palspirrkgekepegeqas  
>NP\_001017535\_VDR\_NLSa  
crlkrvdigmmkefildteevqrkre  
>NP\_001017535\_VDR\_NLSb  
cegckgffrrsmkrkalftc  
>NP\_001018087\_GCR\_nls  
yrkclqagmnlearktkkkikgigqat  
>NP\_000035\_Androgen\_receptor\_nls  
crlrkcyeamtlgarklkl  
>NP\_000955\_RARalpha\_nls  
crlqkcfevgmskesvrndrnkkkkevppk  
>NP\_005243\_c-fos\_nls  
rirrernkmaaakcrnrre  
>NP\_002219\_c-jun\_nls  
rikaerkmrnrriaaskcrkrkl  
>NP\_002690\_oct-6\_nls

dkiaaggrkrkrtsievgv  
>NP\_002819\_TCPTP\_nls  
rkriredrkattaqkvqqmkqrlnenerkrkr
