# Supplementary material for: Characterization and prediction of protein nucleolar localization sequences
Source: PubMed Central journal article supplement — Nucleic Acids Res. 2010 Jul 26;38(21):7388–99. doi: 10.1093/nar/gkq653 (PMC2995072; doi:10.1093/nar/gkq653), 2010-07-26
Supplement: supp_gkq653_SupplementaryFile3.pdf [file supp_gkq653_SupplementaryFile3.pdf]

The nucleotide sequence and corresponding reverse complemented sequence (RC) of the ten NoLSs chosen for experimental validation are shown in black, flanked by adaptors (in red and cyan).

```
>DDX10_NP_004389
GGAAGATCTAAAAACACAGCCATAGGCAGAACAAAAAGAAGCAGTTGAGGAAGCAACTGAAGAAACCCGA
ATGGCAGGTCGAGCGCGAGGGTACCCCG
>DDX10_NP_004389_RC
CGGGGTACCCTCGCGCTCGACCTGCCATTCCGGGTTTCTTCAGTTGCTTCCTCAACTGCTTCTTTTTGTTCT
GCCTATGGCTGTGTTTTTTAGATCTTCC
>SF3B2_NP_006833
GGAAGATCTGGAAGATCTACAGTGTCCGTATCTAAAAAGGAGAAAAACCGGAAGCGTAGGAACCGAAAGAA
GAAGAAAAAGCCCCAGCGGGTGCAGGGGTGTCCTCTGAGGGTACCCCG
>SF3B2_NP_006833_RC
CGGGGTACCCTCAGAGGACACCCCTCGCACCCGCTGGGGCTTTTTCTTCTTCTTTTCGGTTCCTACGCTTCC
GGTTTTTCTCCTTTTAGATACGGACACTGTAGATCTTCCAGATCTTCC
>RBM34_NP_055829
GGAAGATCTAAAGCTGTTCTCCTTAAACGAAGAAGAAAGGACAGAAGAAAAGTGGACGCCCTAAGAAACA
GAGAAAAACAGAAAAGGTACCCCG
>RBM34_NP_055829_RC
CGGGGTACCCTTTCTGTTTTCTGTGTTCTTAGGGCGTCCACTTTTCTTCTGTCCTTTCTTCTCGTTTTAA
GGAGAACAGCTTTAGATCTTCC
>CEBPZ_NP_005751
GGAAGATCTGCAAAAAGTATCATCAAGAAAAAGAAACATTTTTAAAAAGAAGAGGATTAACCCTCAAAA
AACTAAAAACAAAGGAAAAGGTACCCCG
>CEBPZ_NP_005751_RC
CGGGGTACCCTTTCCTTTGTTTTTTAGTTTTTTGAGTGGTTTTAATCCTCTTCTTTTTAAAAATGTTTCTTTT
TCTTGATGATACTTTTTGCAGATCTTCC
>SPR72_NP_008878
GGAAGATCTCAACCAAAGGAACAAGGACAGGGAGATTTGAAAAAGAAGAAAAAGAAAAAGGGGAAAATT
GCCTAAGAAATTATGACCCAAAAAGGTACCCCG
>SPR72_NP_008878_RC
CGGGGTACCCTTTTGGGTCATAATTCTTAGGCAATTTTCCCTTCTTTTTCTTTTTCTTCTTTTCAAATCTC
CCTGTCCTTGTTCCTTTGGTTGAGATCTTCC
>SMARCA2_NP_620614
GGAAGATCTCAAGCCAGGCAGCCAAAGAGAAGAAGAAGAGGAGGAGGAGGAAGAAGAAGGCTGAGGAGAA
TGCAGAGGGTGGGAGGTACCCCG
>SMARCA2_NP_620614_RC
CGGGGTACCCTCCACCTCTGCATTCTCCTCAGCCTTCTTCTTCTCCTCCTCCTCCTTCTTCTTCTTTGG
CTGCCCTGGGCTTGAAGATCTTCC
>AP3D1_O14617-4
GGAAGATCTCGGCGGCACCAGGCAGAACGCTGGAGAAGGACAAGAGGAGGAAAAAGAGGAAGGAGAAGGAGGA
GCGGACCAAAGCAAGAAGAAGTCCAAGAAGGGTACCCCG
>AP3D1_O14617-4_RC
CGGGGTACCCTTCTTGGACTTCTTCTTGCCTTTGGTCCGCTCCTCCTTCTCCTTCTTCTTTTCTCCTCT
TGTCCTTCTCCAGTTCTGCCGGTGCCGCCGAGATCTTCC
>RBBP6_Q7Z6E9-4
GGAAGATCTAGTCAGGACAGCAAGAAGAAGAAGAAAAAGAAGAAAAAGAAAAACACAAGAAACATAAAAA
GCATAAGAAGCATAAGAAACATGGTACCCCG
>RBBP6_Q7Z6E9-4_RC
CGGGGTACCCTATGTTCTTATGCTTCTTATGCTTTTTATGTTTCTTGTTGTTTTTCTTTTCTTCTTTTCT
TCTTCTTCTGCTGTCTGACTAGATCTTCC
>RNF213_Q9HCF4-3
GGAAGATCTTCCCTGGACCGTCCAAGAAAGCAAAAAGAAGAAAAGGAAGAAGAAAAAGAGGGGAACAAGTC
CGCTTCTCAGAGGGTACCCCG
>RNF213_Q9HCF4-3_RC
CGGGGTACCCTCTGAGGAAGCGGACTTGTTCCCTTCTTTTTCTTCTTCTTCTTCTTTTCTTCTTTTCTT
```

GGACGGTCCAGGAAGATCTTCC

>Clorf35\_NP\_077295

GGAAGATCTCACAGGAAAAGCAAGAAGGAGAAGAAGAAAAAGAAAAAGAGGAAACACAAGAAAGAGAAGAA  
GAAGAAAGACAAAGAGCACAGGCGGCCAGGTACCCCG

>Clorf35\_NP\_077295\_RC

CGGGGTACCTGGCCGCCTGTGCTCTTTGTCTTTCTTCTTCTTCTTCTTCTTCTTGTGTTTCCTCTTTTCTTTT  
TCTTCTTCTCCTTCTTGCTTTTCTGTGAGATCTTCC
