# Supplementary material for: Characterization and prediction of protein nucleolar localization sequences
Source: PubMed Central journal article supplement — Nucleic Acids Res. 2010 Jul 26;38(21):7388–99. doi: 10.1093/nar/gkq653 (PMC2995072; doi:10.1093/nar/gkq653), 2010-07-26

Experimental validation of predicted NoLSs by fusion to GFP and visualization by microscopy

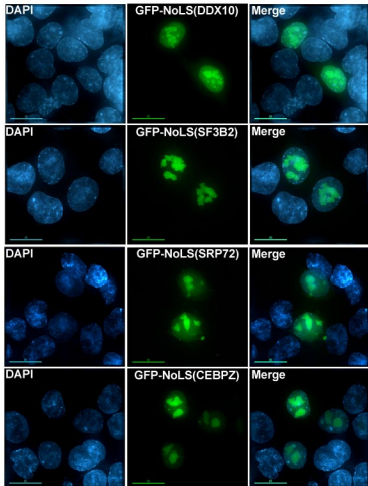

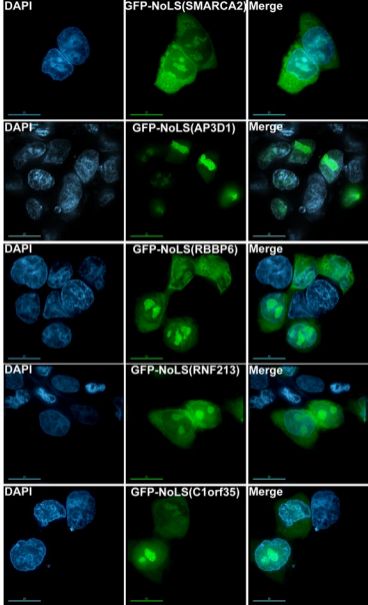

## Negative controls for experimental validation

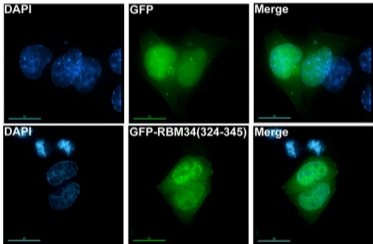

Supplement: supp_gkq653_SupplementaryFile6.pdf [file supp_gkq653_SupplementaryFile6.pdf]
