# Supplementary figures and images for: Characterization and prediction of protein nucleolar localization sequences
Source: PubMed Central journal article supplement — Nucleic Acids Res. 2010 Jul 26;38(21):7388–99. doi: 10.1093/nar/gkq653 (PMC2995072; doi:10.1093/nar/gkq653), 2010-07-26

## Amino acid composition of EVN sequences (error bars represent standard deviation)

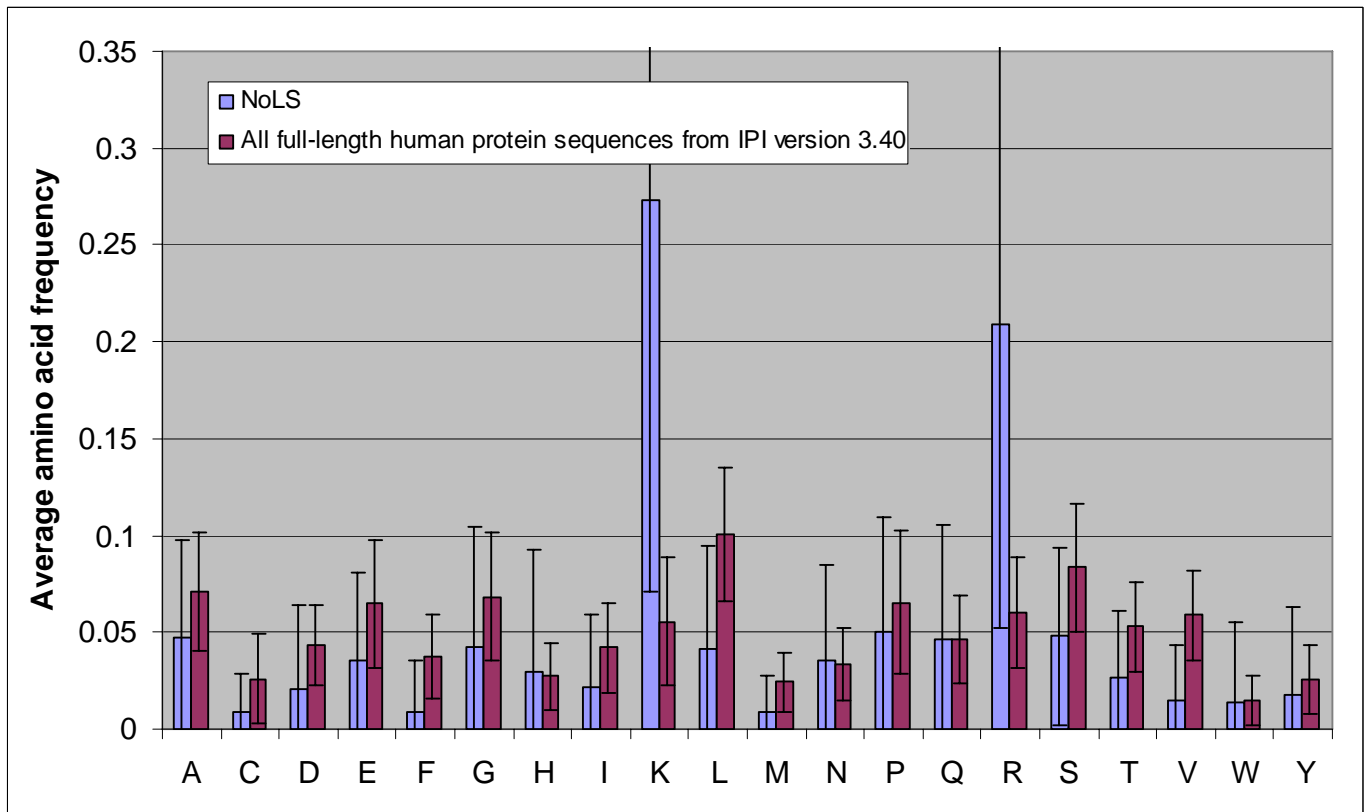

Supplement: supp_gkq653_SupplementaryFile4.pdf [file supp_gkq653_SupplementaryFile4.pdf]
